# Supplementary material for: Assessment of sex and racial biases in electronic health records of emergency department patients with acute coronary syndrome
Source: Research Square preprint supplement (doi:10.21203/rs.3.rs-1735655/v1), 2022-06-08
Supplement: Supplementary file 1 [file 04dad93f51a5c55894b2acf4.docx]

**Supplementary Table 1:** International Classification of Diseases (ICD) 9th and 10th revision codes used to identify patients with acute coronary syndrome.

| **ICD-9** | **ICD-10** |
| --- | --- |
| 410.00, 410.01, 410.02, 410.10,  410.11, 410.12, 410.20, 410.21,  410.22, 410.30, 410.31, 410.32,  410.40, 410.41, 410.42, 410.50,  410.51, 410.52, 410.60, 410.61,  410.62, 410.70, 410.71, 410.72,  410.80, 410.81, 410.82, 410.90,  410.91, 410.92, 411.1, 411.81,  411.89, 413.1 | I21.A, I21.A1, I21.A9, I21.0, I21.1  I21.2, I21.3, I21.4, I21.9, I22.0,  I22.1, I22.2, I22.8, I22.9, I20.0, I20.1, I24.0, I24.8, I24.9 |

**Supplementary Table 2:** EHR data used to evaluate data missingness, differences in symptoms, time-to-treatment, and cluster analysis

| **Feature** | **Sub-categories** | **Unit** | **Feature missingness** | **Cluster analysis** |
| --- | --- | --- | --- | --- |
| Vital signs | Body temperature | ∘C | ✓ | ✓ |
| Systolic blood pressure | mm Hg | ✓ | ✓ |
| Diastolic blood pressure | mm Hg | ✓ | ✓ |
| Respiratory rate | beats/min | ✓ | ✓ |
| SpO2 | mm Hg | ✓ | ✓ |
| Heart rate | beats/min | ✓ |  |
| Basic Metabolic Panel | Blood urea nitrogen | mg/dL | ✓ |  |
| Creatinine | mg/dL | ✓ |  |
| Glucose | mg/dL | ✓ |  |
| ACS Symptoms | Chest pain |  |  | ✓ |
| Dyspnea |  |  | ✓ |
| Dizziness |  |  | ✓ |
| Nausea |  |  | ✓ |
| Diaphoresis |  |  | ✓ |
| Epigastric pain |  |  | ✓ |
| Unexplained fatigue |  |  | ✓ |
| Jaw pain |  |  | ✓ |
| Palpitation |  |  | ✓ |
| Shoulder pain |  |  | ✓ |
| Abdominal pain |  |  | ✓ |
| Coughing |  |  | ✓ |
| Medications | Antiplatelets |  |  |  |
| Anticoagulation (Heparin) |  |  |  |
| Opiates |  |  |  |
| Beta blockers |  |  |  |
| Low molecular weight Heparin |  |  |  |
| Calcium channel blockers |  |  |  |
| ACE inhibitors |  |  |  |
| Direct Thrombin inhibitors |  |  |  |
| Glycoprotein IIb/IIIa |  |  |  |
| Factor Xa inhibitors |  |  |  |
| Anti-ischemic/Anti-anginal |  |  |  |

**Supplementary Table 3:** Marginal Structural Models to determine associations between primary symptoms (chest pain and dyspnea) and sensitive variables (sex and race). When predicting symptoms with race, the model was adjusted for age and sex. When predicting symptoms with sex, the model was adjusted for age and race.

| **Predictor** | **Outcome** | **Causal Odds Ratio** | **95% CI** | **P-value (two-tail)** |
| --- | --- | --- | --- | --- |
| Female | Dyspnea | 1.033 | (0.943 - 1.132) | 0.483 |
| Female | Chest pain | 0.967 | (0.884 - 1.058) | 0.465 |
| African American | Dyspnea | 0.651 | (0.556 - 0.763) | <0.0001***** |
| African American | Chest pain | 0.639 | (0.547 - 0.746) | <0.0001***** |
| Asian | Dyspnea | 0.692 | (0.494 - 0.971) | 0.033**⋅** |
| Asian | Chest pain | 0.699 | (0.503 - 0.972) | 0.033**⋅** |
| Caucasian | Dyspnea | 1.438 | (1.346 - 1.536) | <0.0001* |
| Caucasian | Chest pain | 1.529 | (1.433 - 1.632) | <0.0001* |

‘**∗**’ or ‘**·**’ associated with numbers in the table indicating that these values are either significant ‘∗’ or marginally significant ‘·’. Significance codes (Bonferroni-adjusted *p*-value 0.05/14 = 0.00375): 0; “*****” = 0.00375; “**·**” = 0.05; Abbreviations used: CI - Confidence Interval; P>|z| - two-tail probability value

**
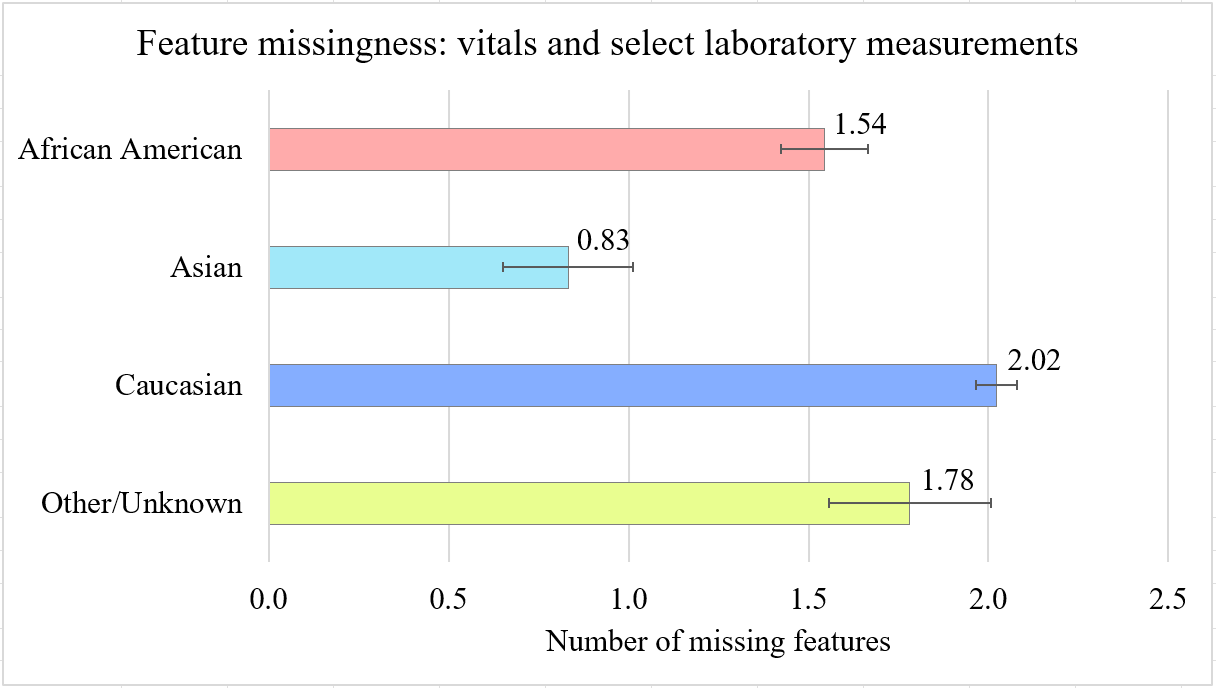
**

**Supplementary Figure 1:**  Graph depicting missingness of EHR data based on vital signs and basic metabolic panel (BMP) of patient visits categorized by race. The mean values and 95% confidence intervals are presented.

**Supplementary Table 4:** Time-to-treatment differences across the clusters:

| **Z-test** | | | | |
| --- | --- | --- | --- | --- |
| **Group A** | **Group B** | **z-statistics** | **P-value (one-tail)** | **Cohen’s d** |
| 2 | 3 | -9.42 | < 0.0001* | -0.534 |
| 3 | 0 | 8.23 | < 0.0001* | 0.481 |
| 2 | 1 | -8.16 | < 0.0001* | -0.287 |
| 1 | 0 | 6.68 | < 0.0001* | 0.249 |
| 1 | 3 | -3.84 | < 0.0001* | -0.202 |
| 2 | 0 | -0.91 | 0.18 | -0.039 |
| **Mann-Whitney U-Test** | | | | |
| **Group A** | **Group B** | **p-value** | **Rank-biserial r** | |
| 3 | 2 | < 0.0001* | 0.40 | |
| 3 | 0 | < 0.0001* | 0.38 | |
| 1 | 2 | < 0.0001* | 0.18 | |
| 1 | 0 | < 0.0001* | 0.17 | |
| 3 | 1 | < 0.0001* | 0.19 | |
| 0 | 2 | 0.256 | 0.02 | |

Cluster description: chest pain and no dyspnea (cluster 0), no dominant symptom and almost no chest pain and dyspnea (cluster 1), nearly all chest pain and dyspnea (cluster 2), all with dyspnea and almost all without chest pain (cluster 3). ‘**∗**’ or ‘**·**’ associated with numbers in the table indicating that these values are either significant ‘∗’ or marginally significant ‘·’. Significance codes (Bonferroni-adjusted *p*-value 0.05/14 = 0.00357): 0; “*****” = 0.00357; “**·**” = 0.05; Abbreviations used: CI - Confidence Interval; P>|z| - two-tail probability value

**Supplementary Table 5:** Differences in the proportion of visits receiving no pharmacological treatment

| **Z-test** | | | | |
| --- | --- | --- | --- | --- |
| **Group A** | **Group B** | **z-statistics** | **P-value (one-tail)** | **Cohen’s d** |
| 1 | 0 | 8.58 | < 0.0001 | 0.300 |
| 2 | 0 | 4.89 | < 0.0001 | 0.197 |
| 3 | 0 | 4.42 | < 0.0001 | 0.237 |
| 2 | 1 | -4.00 | < 0.0001 | -0.129 |
| **Mann-Whitney U-Test** | | | | |
| **Group A** | **Group B** | **p-value** | **Rank-biserial r** | |
| 1 | 0 | < 0.0001 | 0.100 | |
| 2 | 0 | < 0.0001 | 0.055 | |
| 3 | 0 | < 0.0001 | 0.062 | |
| 1 | 2 | < 0.0001 | 0.045 | |

Cluster description: all chest pain and no dyspnea (cluster 0), no dominant symptoms, and almost no chest pain and dyspnea (cluster 1), almost all with dyspnea and chest pain (cluster 2), all with dyspnea and almost all without chest pain (cluster 3).

‘**∗**’ or ‘**·**’ associated with numbers in the table indicating that these values are either significant ‘∗’ or marginally significant ‘·’. Significance codes (Bonferroni-adjusted *p*-value 0.05/14 = 0.00375): 0; “*****” = 0.00375; “**·**” = 0.05; Abbreviations used: CI - Confidence Interval; P>|z| - two-tail probability value
